**Total recoil: perch compliance alters jumping performance and kinematics in green anole lizards (*Anolis carolinensis*)**

Casey A. Gilman, Michael Bartlett, Gary Gillis and Duncan Irschick

10.1242/jeb.069724

There was an error published in *J. Exp. Biol.* **215**, 220-226.

In Fig. 1B, the heading was given incorrectly as 'Lizards <3 g'. It should have read 'Lizards >3 g', as stated in the figure caption.

We apologise to the authors and readers for this error.
